# Supplementary material for: Trends in utilisation of ultrasound by older Australians (2010–2019)
Source: PubMed Central journal article supplement (PMC9883967; doi:10.1186/s12877-023-03771-y), 2023-01-27
Supplement: 12877_2023_3771_MOESM1_ESM.pdf [file 12877_2023_3771_MOESM1_ESM.pdf]

**Table S1** MBS codes investigated

---

|                               | Body area                                                 | MBS items                                                                                                                                                                                                                                                                                                   |
|-------------------------------|-----------------------------------------------------------|-------------------------------------------------------------------------------------------------------------------------------------------------------------------------------------------------------------------------------------------------------------------------------------------------------------|
| <b><i>Ultrasonography</i></b> |                                                           |                                                                                                                                                                                                                                                                                                             |
| Chest                         | Heart                                                     | 55113, 55114, 55118, 55125                                                                                                                                                                                                                                                                                  |
|                               | Chest, abdominal wall                                     | 55812, 55813 <sup>&amp;</sup> , 55814, 55125                                                                                                                                                                                                                                                                |
| Abdomen                       | Abdomen (including urinary tract)                         | 55036, 55037, 55038, 55039                                                                                                                                                                                                                                                                                  |
|                               | Abdominal vessels                                         | 55276, 55278                                                                                                                                                                                                                                                                                                |
| Extremities                   | Hand, wrist, elbow, humerus, forearm, shoulder, upper arm | 55800, 55801 <sup>&amp;</sup> , 55802, 55803 <sup>&amp;</sup> , 55804, 55805 <sup>&amp;</sup> , 55806, 55807, 55808, 55809 <sup>&amp;</sup> , 55810, 55811 <sup>&amp;</sup>                                                                                                                                 |
|                               | Buttock, thigh, knee, lower leg, ankle, foot              | 55824, 55825 <sup>&amp;</sup> , 55826, 55827, 55828, 55829 <sup>&amp;</sup> , 55830, 55831 <sup>&amp;</sup> , 55832, 55833 <sup>&amp;</sup> , 55834, 55835 <sup>&amp;</sup> , 55836, 55837 <sup>&amp;</sup> , 55838, 55839 <sup>&amp;</sup> , 55840, 55841 <sup>&amp;</sup> , 55842, 55843 <sup>&amp;</sup> |
|                               | Extremities vessels                                       | 55238, 552444, 55248, 55252                                                                                                                                                                                                                                                                                 |
| Hip and Pelvis                | Hip                                                       | 55816, 55817 <sup>&amp;</sup> , 55818, 55819 <sup>&amp;</sup>                                                                                                                                                                                                                                               |
|                               | Pelvis and pelvic                                         | 55044, 55045, 55065, 55067, 55068, 55069, 55731, 55733                                                                                                                                                                                                                                                      |

---

**Abbreviation:** MBS: Medicare Benefit Schedule.

**Note:** <sup>&</sup> Service started after the financial year 2009/2010.
