# Supplementary material for: Trends in utilisation of ultrasound by older Australians (2010–2019)
Source: PubMed Central journal article supplement (PMC9883967; doi:10.1186/s12877-023-03771-y), 2023-01-27
Supplement: 12877_2023_3771_MOESM2_ESM.pdf [file 12877_2023_3771_MOESM2_ESM.pdf]

**Supplementary Table 2:** Number of Australians ≥65 years old between 2010 and 2019 by age-sex group as provided by the Australian Bureau of Statistics.

|                | 2010      | 2011      | 2012      | 2013      | 2014      | 2015      | 2016      | 2017      | 2018      | 2019      |
|----------------|-----------|-----------|-----------|-----------|-----------|-----------|-----------|-----------|-----------|-----------|
| <b>Men</b>     |           |           |           |           |           |           |           |           |           |           |
| 65-74          | 761,288   | 822,878   | 813,549   | 920,511   | 956,825   | 989,503   | 1,025,951 | 1,057,029 | 1,089,381 | 1,114,146 |
| 75-84          | 439,404   | 448,527   | 448,983   | 470,988   | 485,668   | 495,902   | 510,657   | 531,605   | 552,182   | 579,485   |
| ≥85            | 127,528   | 138,934   | 139,070   | 156,490   | 164,903   | 171,882   | 179,238   | 185,066   | 190,647   | 198,110   |
| Total ≥65      | 1,328,220 | 1,410,339 | 1,419,602 | 1,547,989 | 1,607,396 | 1,657,287 | 1,715,846 | 1,773,700 | 1,832,210 | 1,891,741 |
| <b>Women</b>   |           |           |           |           |           |           |           |           |           |           |
| 65-74          | 793,853   | 848,781   | 850,382   | 942,751   | 982,490   | 1,017,187 | 1,057,318 | 1,094,545 | 1,134,663 | 1,168,531 |
| 75-84          | 544,632   | 553,046   | 553,390   | 564,323   | 574,672   | 582,767   | 595,646   | 614,740   | 633,686   | 660,313   |
| ≥85            | 247,631   | 264,373   | 264,537   | 283,105   | 291,630   | 297,063   | 303,441   | 307,857   | 312,416   | 317,594   |
| Total ≥65      | 1,586,116 | 1,666,200 | 1,668,309 | 1,790,179 | 1,848,792 | 1,897,017 | 1,956,405 | 2,017,142 | 2,080,765 | 2,146,438 |
| <b>Persons</b> |           |           |           |           |           |           |           |           |           |           |
| 65-74          | 1,555,141 | 1,671,659 | 1,681,931 | 1,863,262 | 1,939,315 | 2,006,690 | 2,083,269 | 2,251,574 | 2,224,044 | 2,282,677 |
| 75-84          | 984,036   | 1,001,573 | 1,002,373 | 1,035,311 | 1,060,340 | 1,078,669 | 1,106,303 | 1,146,345 | 1,185,868 | 1,239,798 |
| ≥85            | 375,159   | 403,307   | 403,607   | 439,595   | 456,533   | 468,945   | 482,679   | 492,923   | 503,063   | 515,704   |
| Total ≥65      | 2,914,336 | 3,076,539 | 3,087,911 | 3,338,168 | 3,456,188 | 3,554,304 | 3,790,842 | 3,790,842 | 3,912,975 | 4,038,179 |

**Source:** The Australian Bureau of Statistics (<https://www.abs.gov.au/statistics/people/population>).
